# Supplementary material for: Inaccurate Assessment of Canine Body Condition Score, Bodyweight, and Pet Food Labels: A Potential Cause of Inaccurate Feeding
Source: Vet Sci. 2017 Jun 9;4(2):30. doi: 10.3390/vetsci4020030 (PMC5606605; doi:10.3390/vetsci4020030)
Supplement: Supplementary file 1 [file vetsci-04-00030-s001.pdf]

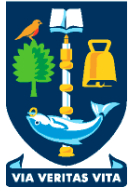

University of Glasgow | School of Veterinary Medicine

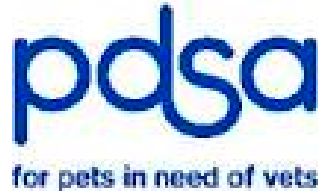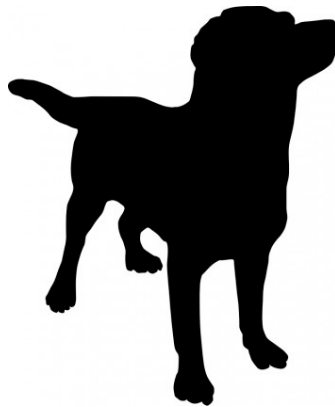

## **Aim of the survey**

We are investigating dog body shape and pet food labels.

## **About the survey**

- This survey contains 4 sections. It should take 5 minutes to complete.
- It asks for details about you and your dog.
- All data will be anonymous so we can't identify individuals
- Consent to take part in this study will be inferred through completion of the questionnaire

**THANK YOU**

[Type text]

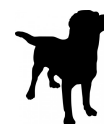

## Section 1: Details about you and your dog

---

| About your dog                                                                        |                                                                                                                                                                                                                             |
|---------------------------------------------------------------------------------------|-----------------------------------------------------------------------------------------------------------------------------------------------------------------------------------------------------------------------------|
| Age of your dog                                                                       | _____ Years _____ Months                                                                                                                                                                                                    |
| Sex of your dog                                                                       | <input type="checkbox"/> Entire Male <input type="checkbox"/> Entire Female<br><input type="checkbox"/> Neutered Male <input type="checkbox"/> Neutered Female                                                              |
| Breed                                                                                 | <input type="checkbox"/> Pedigree <input type="checkbox"/> Crossbreed                                                                                                                                                       |
| If your dog is a pedigree, please write the breed in the box                          |                                                                                                                                                                                                                             |
| Please estimate how much your dog weighs (either in stone/lbs/kgs)?                   | _____ stone/lbs<br>Or<br>_____ kg                                                                                                                                                                                           |
| Which of the word descriptions best describes your dog's body shape?                  | <input type="checkbox"/> Thin <input type="checkbox"/> Slightly thin <input type="checkbox"/> Just right<br><input type="checkbox"/> Slightly overweight <input type="checkbox"/> Overweight                                |
| When you walk your dog on the average day, is he/she on or off the lead most of time? | <input type="checkbox"/> He/she is on the lead most of time<br><input type="checkbox"/> He/she is off the lead most of the time                                                                                             |
| How much time on average does your dog spend running off lead/after toys ?            | <input type="checkbox"/> Less than 10 minutes<br><input type="checkbox"/> 10 - 30 minutes<br><input type="checkbox"/> 30 - 60 minutes<br><input type="checkbox"/> 60 minutes or more<br><input type="checkbox"/> Don't know |
| Do you feed your dog table scraps?                                                    | <input type="checkbox"/> Never<br><input type="checkbox"/> Every day<br><input type="checkbox"/> A few times a week<br><input type="checkbox"/> Less than weekly<br><input type="checkbox"/> Never                          |

[Type text]

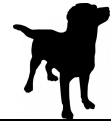

### Health of your dog

Does your dog have an ongoing illness or condition?

☐ Yes ☐ No

If so please list:

Is your dog on any current medication?

☐ Yes ☐ No

If so please list:

When was your dog's last visit to the vet?

☐ less than 3 months ago  
☐ between 3 months and one year ago  
☐ over a year ago

How do you think your dog would rate his/her quality of life?

☐ ☐ ☐ ☐ ☐ ☐ ☐  
0 1 2 3 4 5 6

From 0-6 where 0 is couldn't be worse to 6 being couldn't be better?

Bad Great

[Type text]



| <b>About you</b>                               |                                                                                                                                                                                                                                                                                                               |
|------------------------------------------------|---------------------------------------------------------------------------------------------------------------------------------------------------------------------------------------------------------------------------------------------------------------------------------------------------------------|
| Your age (Years)                               | <input type="checkbox"/> 18-35 <input type="checkbox"/> 36-50 <input type="checkbox"/> 51-65<br><input type="checkbox"/> > 65                                                                                                                                                                                 |
| Your gender                                    | <input type="checkbox"/> Male <input type="checkbox"/> Female                                                                                                                                                                                                                                                 |
| What is your personal annual income?           | <input type="checkbox"/> Less than £10,000<br><input type="checkbox"/> £10,000-£20,000<br><input type="checkbox"/> £20,000-£40,000<br><input type="checkbox"/> > £40,000<br><input type="checkbox"/> Don't know / Would rather not say                                                                        |
| What description best fits your education?     | <input type="checkbox"/> No formal qualifications<br><input type="checkbox"/> Standard grades/GCSE<br><input type="checkbox"/> Higher grades/A levels<br><input type="checkbox"/> Degree<br><input type="checkbox"/> Postgraduate qualification<br><input type="checkbox"/> Don't know / Would rather not say |
| What are the first 4 letters of your postcode? |                                                                                                                                                                                                                                                                                                               |

## Section 2: Your dog's body shape

---

On the next page, there are some pictures of different body shapes of dogs.

Please tick the box next to the picture that best describes your dog.

[Type text]

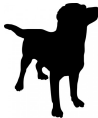

|                                                                            |  |  |  |  |  |
|----------------------------------------------------------------------------|--|--|--|--|--|
|                                                                            |  |  |  |  |  |
| Q1: Please tick the body shape that is closest to your dog?                |  |  |  |  |  |
| Q2: Please tick the body shape that you would most like your dog to be?    |  |  |  |  |  |
| Q3: Please tick the body shape that most dogs you see regularly look like? |  |  |  |  |  |

[Type text]

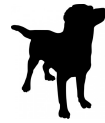

### Section 3: Pet food labels

Below is a label from a dog food can.

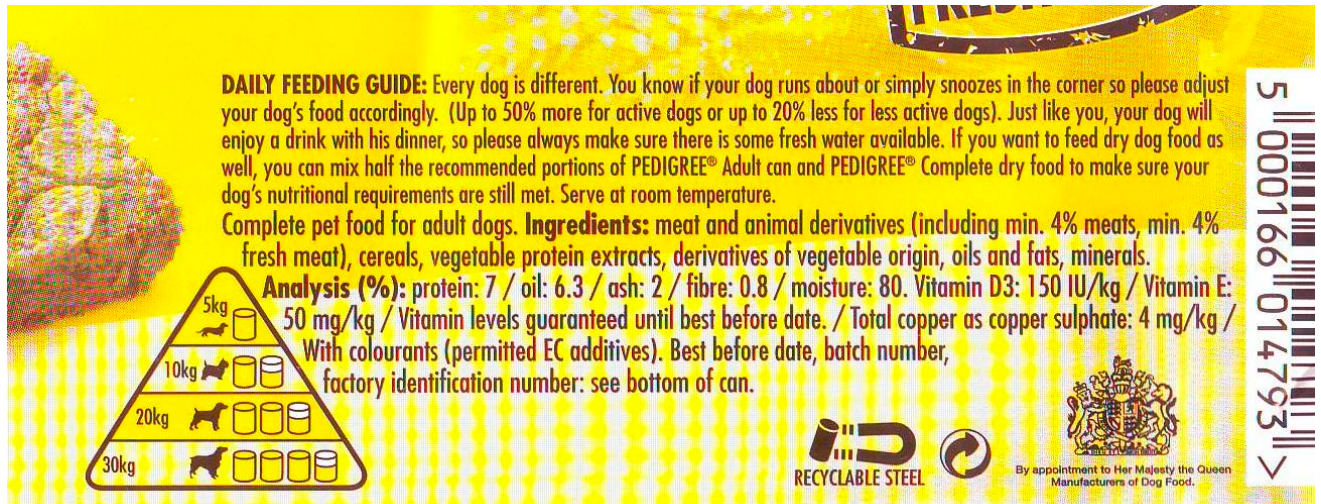

If you were feeding **just** this food to your dog (i.e. no mixer or table scraps), how many tins would you give in total each day?

- ☐ ½ tin
- ☐ 1 tin
- ☐ 1 ½ tins
- ☐ 2 tins
- ☐ 2 ½ tins
- ☐ 3 tins
- ☐ 3 ½ tins
- ☐ 4 tins
- ☐ 4 ½ tins
- ☐ 5 tins
- ☐ Other (please write in amount)\_\_\_\_\_tins

[Type text]

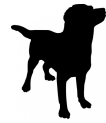

Below is a label from dry dog food.

Visit our website  
[www.purina-bakers.co.uk](http://www.purina-bakers.co.uk)  
for mouth-watering news,  
games, competitions  
and prizes!

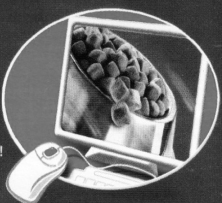

### DAILY FEEDING GUIDE

| SIZE OF DOG                                                                                 |            | DAILY FEED<br>(grams per day) |
|---------------------------------------------------------------------------------------------|------------|-------------------------------|
| 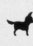 Toy Dog   | 1 - 5 kg   | 35 - 120                      |
| 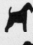 Small Dog | 5 - 10 kg  | 120 - 200                     |
| 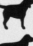 Medium    | 10 - 25 kg | 200 - 405                     |
| 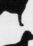 Large     | 25 - 45 kg | 405 - 630                     |
| 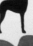 Giant    | 45 - 70 kg | 630 - 880                     |

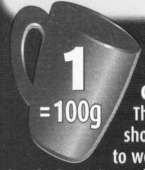

One half pint mug holds  
approximately **100 g** of Bakers  
**Complete® Meaty Meals™**.  
The recommended daily amounts  
should be adjusted according  
to weather conditions, the animal's  
level of activity and its physical condition.  
Individual needs vary and feeding should be  
adjusted as required to help maintain your dog  
at a lean, healthy body weight.

If you were feeding just this food to your dog (i.e. no mixer or table scraps), how many grams would you give **in total** each day?

\_\_\_\_\_ grams

---

[Type text]



## Section 4: Your dog's measurements

---

We will body condition score and weigh your dog. The results will be recorded on this sheet.

If you do not want to take part in this part of the study, please leave your questionnaire in the box provided.

| Your dog's measurements           |           |
|-----------------------------------|-----------|
| Your dogs body condition score is | 1 2 3 4 5 |
| Your dog's weight is (kg)         |           |
| Advice given to owner             |           |
